# Supplementary figures and images for: The influence of environmental drivers on the enrichment of organic carbon in the sea surface microlayer and in submicron aerosol particles – measurements from the Atlantic Ocean
Source: Oxford University Press journal article supplement (doi:10.1525/elementa.225), 2017-01-01

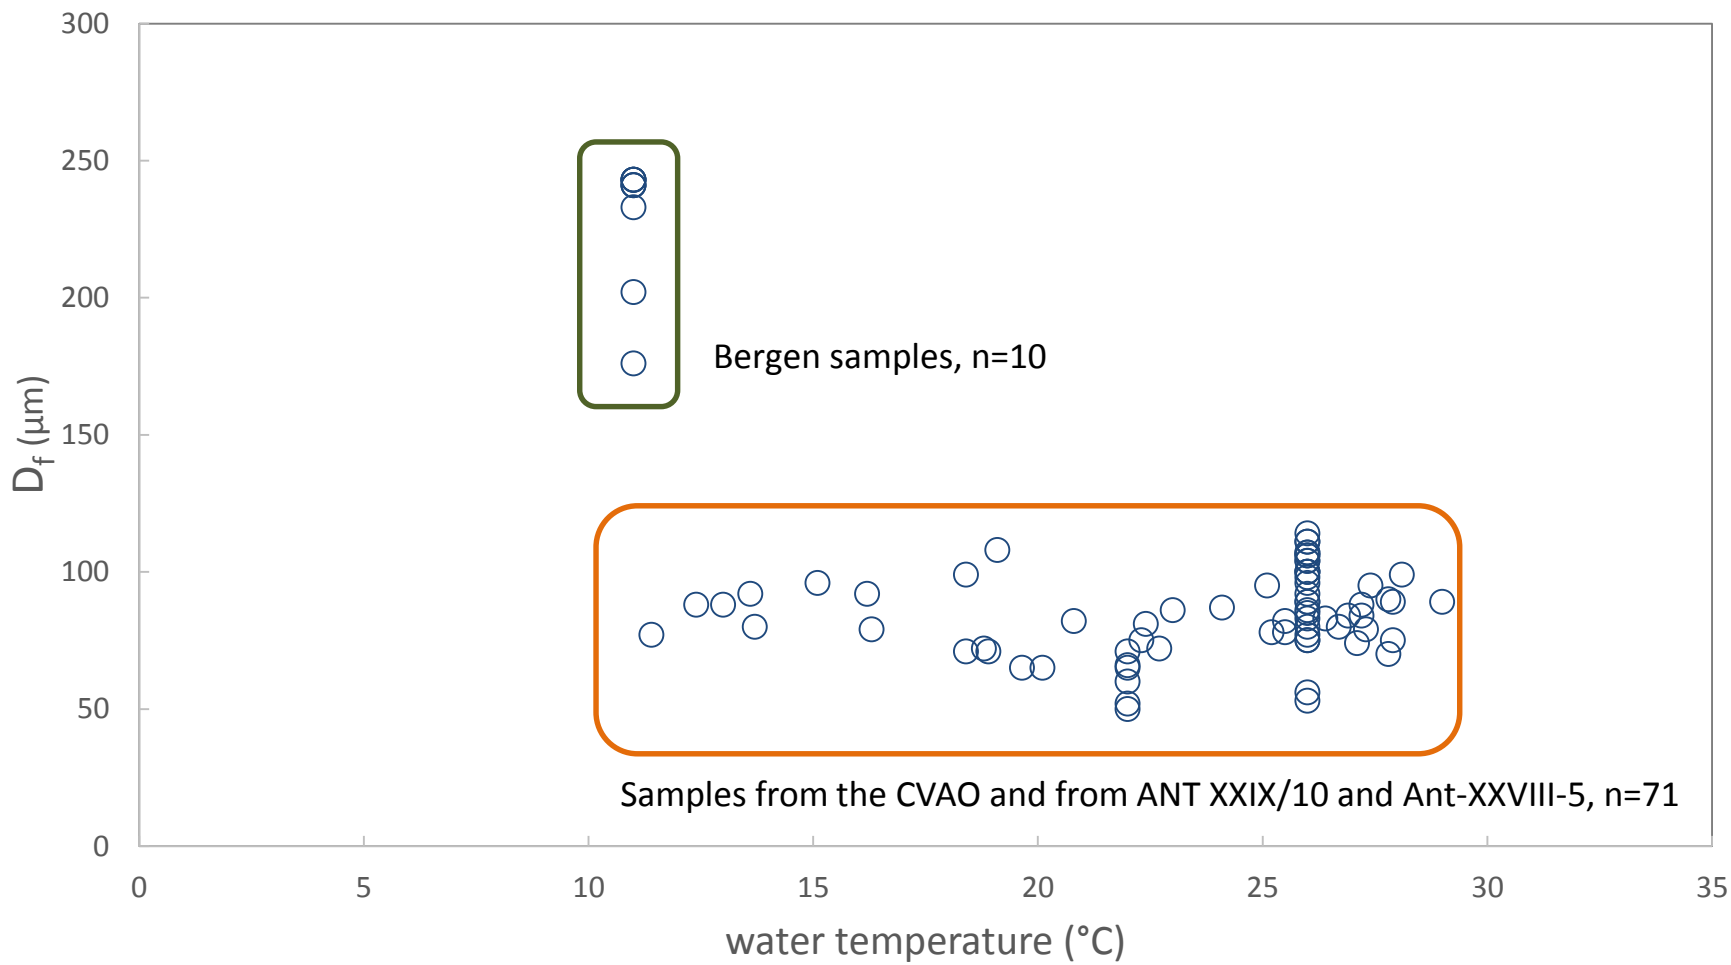

Figure S3

Supplement: elementa-5-225-s3.pdf [file elementa-5-225-s3.pdf]

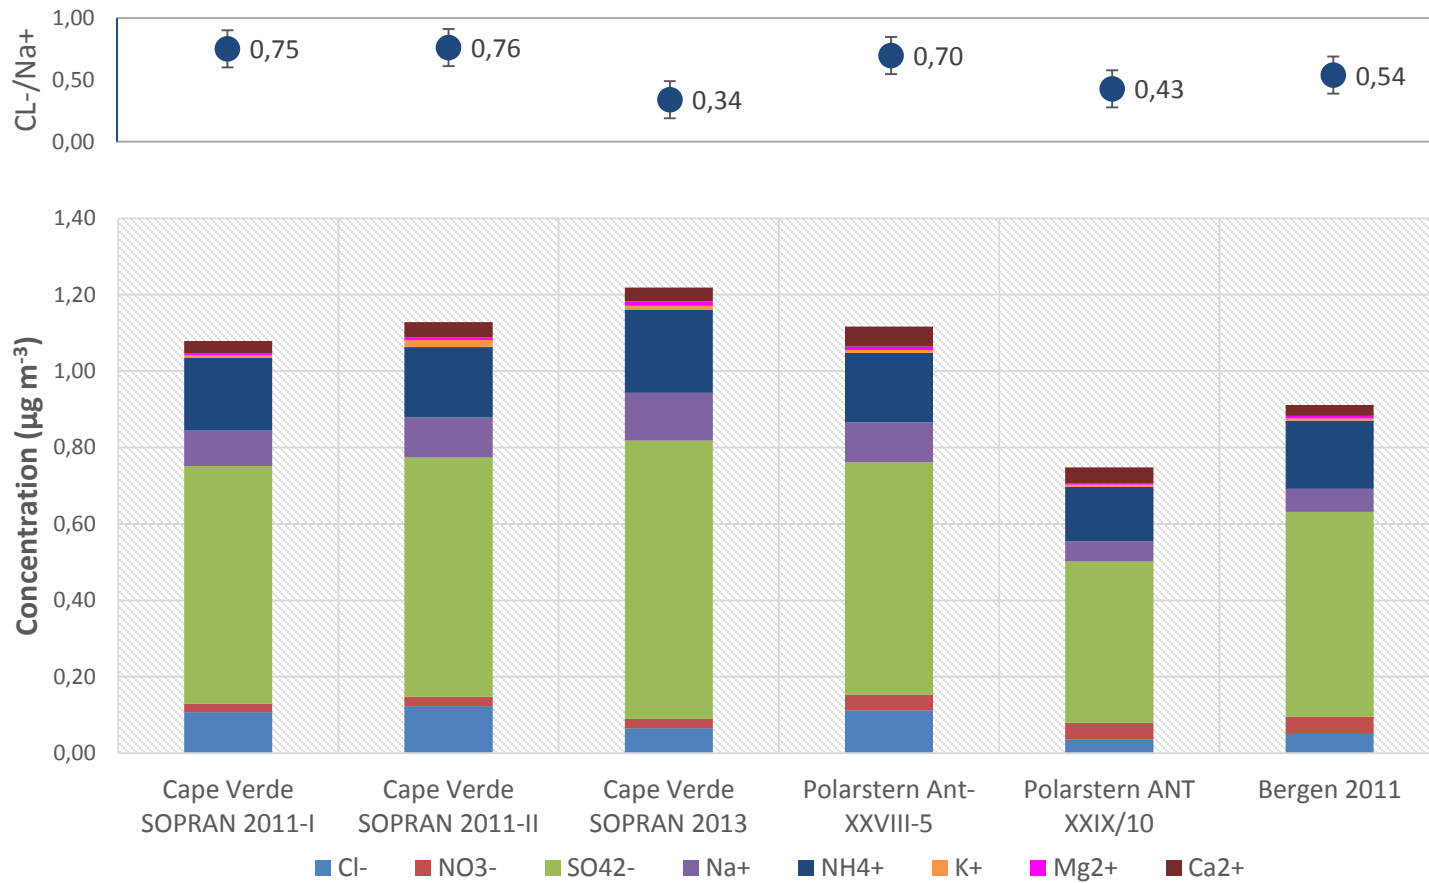

Figure S4

Supplement: elementa-5-225-s4.pdf [file elementa-5-225-s4.pdf]
